# Supplementary material
Source: publisher site journal article supplement (https://www.dovepress.com/article/550542)
Supplement: Supplementary file 1 [file 550542%20Supplementary%20Figure%20S1.docx]

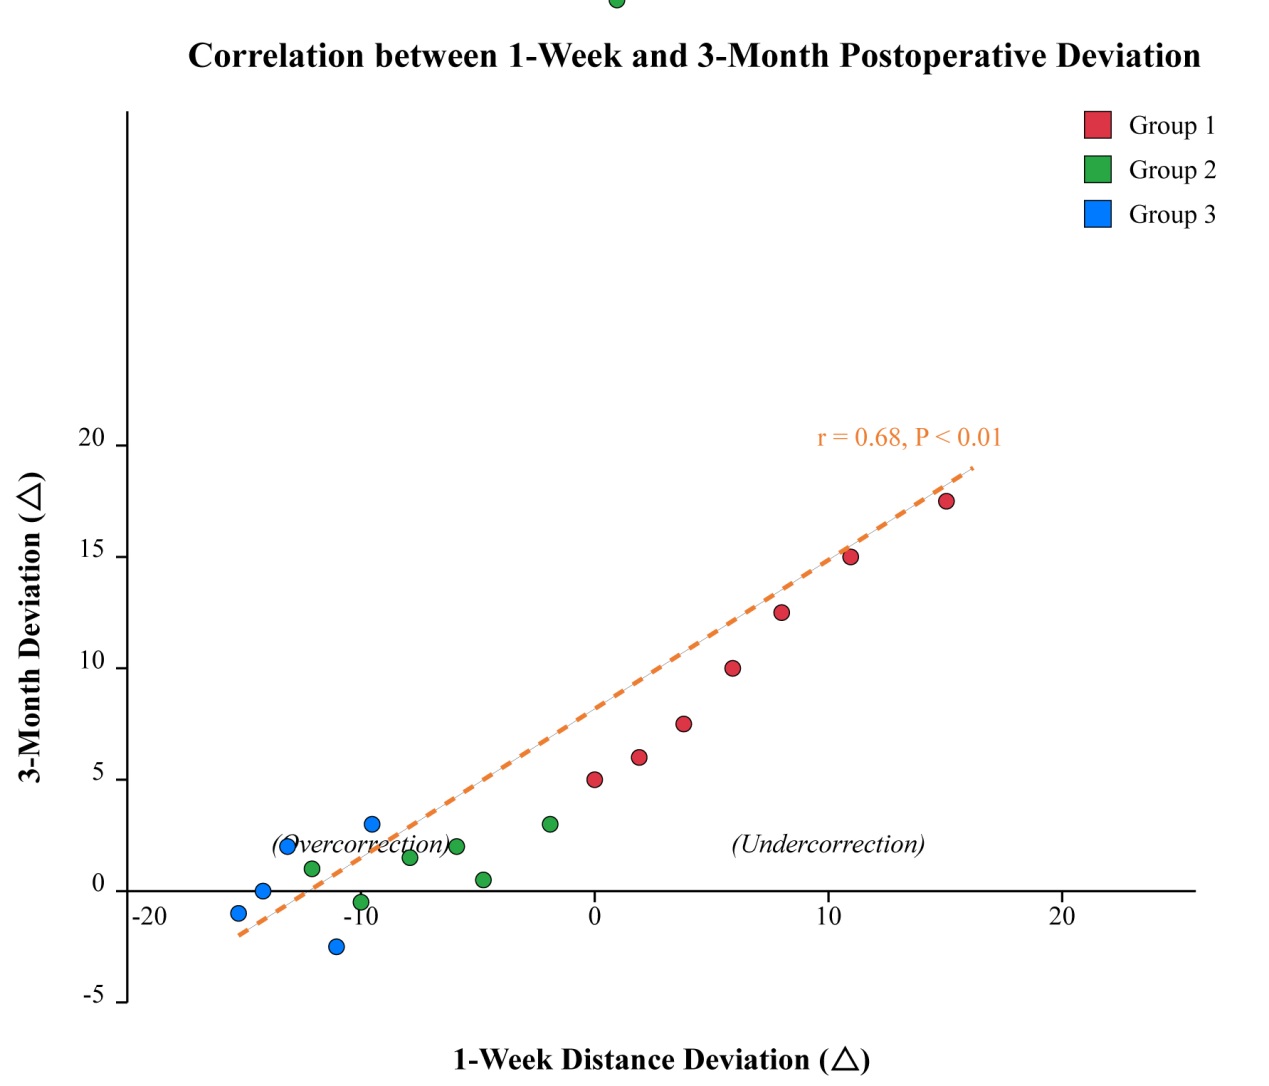


**Supplementary Figure S1:**Scatter plot demonstrating the correlation between distance deviation at the 1-week follow-up and the final horizontal deviation at 3 months. A significant positive correlation (r = 0.68) indicates that a slight initial overcorrection (negative values) is associated with better motor outcomes (closer to 0) at 3 months.
